# Supplementary material
Source: PubMed Central journal article supplement (PMC5894357)
Supplement: NIHMS954384-supplement-supplement_1.pdf [file NIHMS954384-supplement-supplement_1.pdf]

604

## SUPPLEMENTAL METHODS

### 605 **Detailed Mass Spectrometry Methods**

#### 606 *Protein Extraction and Digestion*

607 Cells were extracted in lysis buffer (0.3 % SDS in Tris-buffered saline with 1 % protease inhibitor  
608 cocktail (P8340 Sigma Aldrich, St. Louis, MO, 6 mM dithiothreitol (DTT)). Chloroform/methanol  
609 protein precipitation was performed as described previously.<sup>59</sup> Precipitated protein was dissolved  
610 in 8 M urea in 100 mM NH<sub>4</sub>HCO<sub>3</sub> with 3 mM DTT. Proteins were frozen and stored at -80 °C.

611 Cysteines were then subjected to a final reduction with additional DTT at a final total  
612 concentration of 5.5 mM, at room temperature for 40 minutes. Proteins were alkylated with  
613 iodoacetamide at a concentration of 15 mM in the dark at room temperature for 30 min, and  
614 digested with ~1:100 trypsin:protein (Promega, Madison, Wisconsin) for 16 h at 37 °C. The  
615 resulting digest was acidified to ~ pH 1 with trifluoroacetic acid, kept on ice for 15 min to  
616 precipitate lipids, and centrifuged for 15 min at 20 000 g. Supernatant was transferred to  
617 Nestgroup C18 Macrospin columns (Southborough, MA). The peptides were eluted with 40 %  
618 acetonitrile, lyophilized in a sample vial, and rehydrated in 3 % acetonitrile with 0.1 % formic acid.  
619 A digest of yeast alcohol dehydrogenase at 25 fmol/μL final concentration was added as an internal  
620 detection control (Waters Corp, Milford MA).

621

#### 622 *Liquid Chromatography and Mass Spectrometry*

623 An UltiMate 3000 RSLCNano (Thermo Scientific) ultrahigh pressure liquid chromatograph with  
624 autosampler was used to separate peptides. Peptides were loaded on an Acclaim PepMap 100 75  
625 μm ID x 2 cm, 3 μm particle size trap column (Thermo Scientific) at a flow rate of 5 μL/min with 2  
626 % acetonitrile in water with 0.05 % TFA for 3 min. The analytical separation was conducted using a  
627 75 μm ID x 50 cm, Acclaim PepMap reversed phase C18, 2 μm particle size column (Thermo  
628 Scientific). Flow was 300 nL/min with mixtures of buffer A (aqueous 0.1 % formic acid) and buffer

629 B (80 % acetonitrile in water with 0.1 % formic acid). Separation was by isocratic elution for 10  
630 min with 2 % B, and was followed by linear gradients to 24 % B for 105 min, and to 40.4 % B for 20  
631 min, followed by ramping to 95 % buffer B with an isocratic hold for 3.5 minutes. Final recycle was  
632 accomplished by a 1 min ramp and final hold at 2 % B for 20 min before the next sample.

633 Mass spectra were collected with using a Q Exactive HF (Orbitrap) mass spectrometer  
634 (Thermo Fisher Scientific, Bremen, Germany) in positive ion mode, using data-dependent  
635 acquisition. Settings included top 15 precursors, resolution 120 000 for MS scan, 15 000 for MS/MS  
636 scan, dynamic exclusion for 20 s and maximum injection time of 30 ms for MS and 100 ms for  
637 MS/MS. NCE was set at 28.0. The Nanospray Flex Ion Source (Thermo Scientific, Bremen, Germany)  
638 was operated at 2.2 kV with heated capillary set at 250 °C and the S-Lens RF level at 55.0 %.

639

#### 640 ***Protein Data Analysis***

641 For quantitation and identification, the raw data files were imported into the Elucidator Protein  
642 Expression Analysis System (V. 4.0.0.2.13, PerkinElmer, Boston, MA,). From within Elucidator,  
643 results were searched with the Mascot server (Version 2.5.1, Matrix Science Ltd., London, UK). The  
644 search was against a SwissProt human canonical protein sequence database with isoforms  
645 (UniprotKB/Swiss-Prot Release 2017\_01 containing 84 336 sequences; 48 572 808 residues,  
646 www.uniprot.org). Searches were performed with carbamidomethyl (C) as a fixed modification and  
647 mass accuracy limits of 10 ppm for MS and 0.02 Da for MS/MS with identification significance  
648 threshold of  $p < 0.05$ . Variable modifications were Gln->pyro-Glu (N-term Q), Oxidation (M), Acetyl  
649 (Protein N-term). Elucidator matched accurate mass and retention time values by time alignment of  
650 peaks across all chromatographic runs. Precursor mass features (individual components of MS1  
651 isotopic series) were annotated by PeptideTeller with a predicted error rate of 0.01. Features  
652 detected within 12 and 146 minute retention times and 400-2000 m/z were used for quantitation.  
653 Quantitation was based on RT vs. m/z peak volume. Instrument mass accuracy was set at 5 ppm for

654 PeakTeller. Expression ratio and ratio p-values were calculated by Elucidator and based on the  
655 calculation error function (xdev) incorporated into the program.

656

## 657 **Detailed Metabolomics Methods**

### 658 ***Sample Processing***

659 The individual wells were pooled for each biological replicate. The samples were centrifuged at  
660 2,000 x G at 4 °C for 45 minutes and dried under a stream of nitrogen at 35 °C to 1-1.5 mL, then  
661 transferred into amber autosampler vials and evaporated to dryness. A 20µL aliquot of myristic  
662 acid d27 solution (3 mg Myristic Acid d27 (Sigma, 366889) dissolved in 1mL 2:5:2 Optima  
663 Water/Methanol/Isopropanol (Fisher, W6-1, A456-1, A464-1)) were added to the sample vials as  
664 an internal retention time locking compound. The samples were again evaporated to dryness under  
665 nitrogen at 35 °C, and 0.5mL of methylene chloride (Fisher, Optima D1511) was added 2x to the  
666 vials to azeotrope residual water. Free aldehyde groups were protected by derivatization with 30µL  
667 of 40 mg/mL of methoxyamine·HCl (Sigma, 226904) in pyridine (Fisher, PI27530). Metabolites  
668 were subsequently derivatized by adding 90µL of N-Methyl-N-trimethylsilyltrifluoroacetamide with  
669 1% Trimethylchlorosilane (Sigma, 69478).

670

### 671 ***Gas Chromatography Mass Spectrometry***

672 The derivatized samples were analyzed in triplicate GC-MS chromatograms (Agilent 7890B/5977A)  
673 using a HP-5ms Ultra Inert GC Column, 30 m, 0.25 mm, 0.25 µm (Agilent J&W 19091S-433UI) The  
674 oven temperature gradient was programmed as follows: 60 °C for 1 min; 60 °C to 325 °C at 10  
675 °C/min; 325 °C for 10 min and 60 °C for 1 min.

676

### 677 ***Metabolic Data Analysis***

678 Metabolite identification and quantitation was done with the Automated Mass Spectral  
679 Deconvolution & Identification System (AMDIS, Version 2.72) (National Institute of Standards and  
680 Technology) (NIST) using Retention Index Data type of analysis with the following settings:  
681 component width 12; adjacent peak subtraction 1; resolution, sensitivity, and shape requirements  
682 were set to medium. Agilent Fiehn Library was chosen as the target compounds library with  
683 myristic acid d27 as retention time locking (RTL) compound. Fatty acid methyl esters (FAMES) in  
684 the Agilent Fiehn GC/MS Metabolomics Standards Kit were used for system calibration. Student's t-  
685 test modified with a false discovery correction for multiple testing with a Q-value R-script (Storey  
686 JD and Tibshirani R. 2003. Statistical significance for genome-wide experiments. PNAS, 100: 9440-  
687 9445) was used to generate p-values. Metabolite pathways were analyzed with MetaboAnalyst 3.0  
688 (<http://www.metaboanalyst.ca/>). (Xia J1, Wishart DS. 2011. Web-based inference of biological  
689 patterns, functions and pathways from metabolomic data using MetaboAnalyst. Nat Protoc. 2011.  
690 6:743-60).

691

## 692 **Confirmatory Study Methods**

### 693 ***Flow Cytometry***

694 Differently primed MSCs were collected via 0.25% trypsin-EDTA, washed twice, and then  
695 resuspended in 250 µL BD Cytofix reagent in a 1.5 mL Eppendorf tube (cell counts normalized  
696 across MSC groups). After 10 minutes fixation at 4 °C, cells were washed twice in BD Cytoperm  
697 buffer, after which they were reconstituted in ~95 µL of Cytoperm for cell staining. To this, various  
698 antibodies were added based on the target protein (final volume 100 µL). The catalog number,  
699 fluorescent conjugate, and test size of these antibodies is shown below.

700

| Supplier    | Catalog # | Product Name                                                   | Test Size |
|-------------|-----------|----------------------------------------------------------------|-----------|
| eBioscience | 329713    | Brilliant Violet 421™ anti-human CD274 (B7-H1, PD-L1) Antibody | 5         |

|             |           |                                                             |   |
|-------------|-----------|-------------------------------------------------------------|---|
| Biolegend   | 323109    | PerCP/Cy5.5 anti-human CD47 Antibody                        | 5 |
| Biolegend   | 352509    | Brilliant Violet 421™ anti-human GARP (LRRC32) Antibody     | 5 |
| R&D Systems | FAB2463G  | Human LAP (TGF-beta 1) Alexa Fluor® 488-conjugated Antibody | 5 |
| Biolegend   | 373203    | PE anti-human HLA-F Antibody                                | 5 |
| LSBio       | LS-C62879 | Anti-CFH / Complement Factor H Antibody (clone OX-24, FITC) | 3 |

701

702

703 ***Lysyl Oxidase Activity Assay***

704 The relative lysyl oxidase activity of cell lysates from differently primed MSCs was determined by  
705 using the Abcam Lysyl Oxidase Activity Assay Kit (Fluorometric; ab112139). The assay was run as  
706 per the manufacturer's instructions, where RIPA buffer was used to collect cell lysate. Samples  
707 from different MSC groups were obtained from similar cell numbers, but to verify similar protein  
708 amounts were also used, a BCA assay was conducted. Fluorimetric readings were taken after a 40  
709 minute reaction time. The background fluorescence from a blank sample (assay reagent added 1:1  
710 with buffer as sample) was subtracted off the recorded fluorescence from experimental samples.  
711 Data were analyzed in GraphPad Prism v6.0 (San Diego, CA).

712

713 ***Western Blot***

714 MSCs were washed twice with PBS and lysed with RIPA buffer (Thermo Fisher, 89901) containing  
715 SIGMAFAST™ Protease Inhibitor Cocktail Tablets (SigmaAldrich, S8830). The cell lysate was diluted  
716 1:1 with 2x Laemmli Sample Buffer (Bio-Rad, 610737) and boiled at 70 °C for 10 minutes. The same  
717 amount of protein was loaded into each well of a Criterion TGX 4-20% gel (Bio-Rad, 4561094) and  
718 were resolved by SDS-PAGE and transferred onto a PVDF membrane. After transfer, the membrane  
719 was blocked with SuperBlock Blocking Buffer (ThermoFisher, 37517) for 1 hour and then probed  
720 with an anti-Complement Factor H primary antibody (1:250; Atlas Antibodies, HPA049176) at 4 °C  
721 overnight. The membrane was then washed and incubated with a goat anti-rabbit IRDye 800CW  
722 secondary antibody (1:10,000; Li-cor, 926-32211) for 1 hour.

723 **ELISA**

724 MSCs were cultured as previously described and the supernatant was collected, spun down at  
725 10,000x g for 5 min. and stored at -20 C until analysis. The supernatant levels of ANGPTL4 were  
726 determined using an ELISA assay (Thermo Fisher, EHANGPTL4).

727  
728  
729  
730  
731  
732  
733  
734  
735  
736  
737  
738  
739  
740  
741  
742  
743  
744  
745  
746  
747  
748  
749  
750  
751

**SUPPLEMENTAL FIGURES**

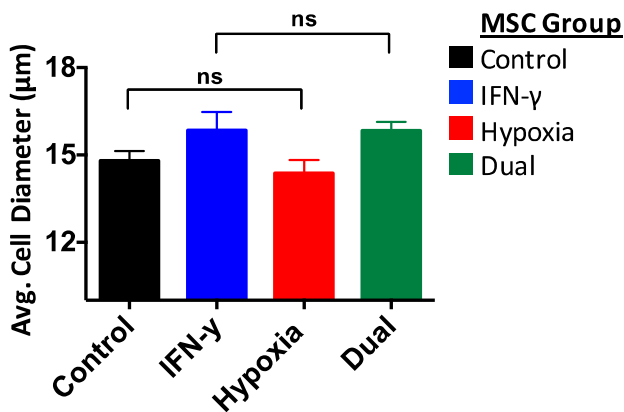

752  
753  
754  
755  
756

*Supplemental Figure 1 The effect of hypoxia and/or IFN-γ priming on the average cell diameter. Cell diameter was determined immediately after passaging using a Countess device. n=5 experiments were averaged. All pairwise comparisons were significant at p<0.05 except where indicated.*

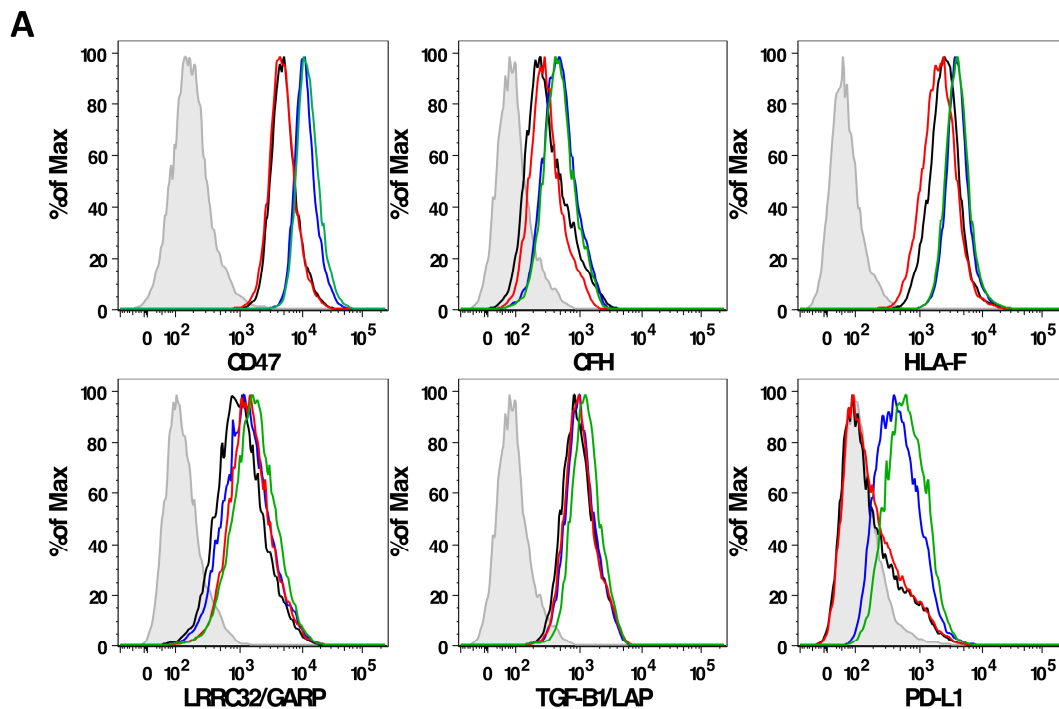

**B** LOX Activity Assay

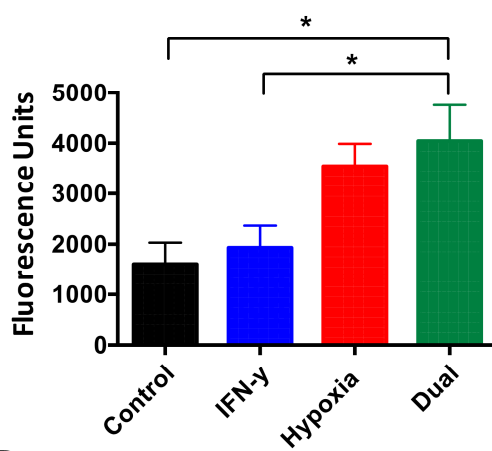

**C** Ang4 ELISA

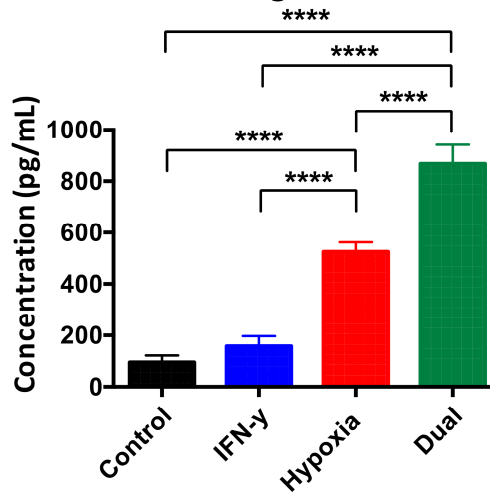

**D**

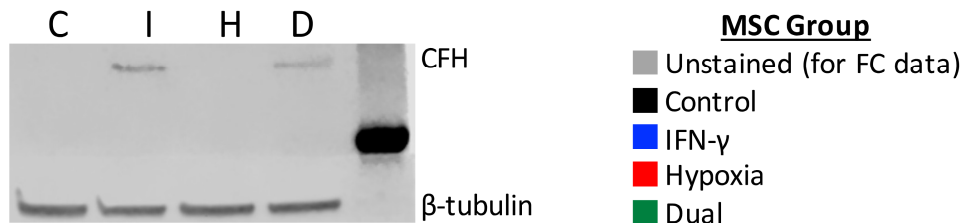

757  
 758 **Supplemental Figure 2 Confirming trends found via mass spectroscopy for select proteins.** A) Flow cytometry was used to assess  
 759 how IFN- $\gamma$  and/or hypoxia affected expression of some proteins that had been detected by a single peptide via mass spectroscopy  
 760 (CFH, HLA-F, PD-L1) or had shown a DE of small magnitude on mass spectroscopy (CD47, LRRC32, TGF-B1). B) Lysyl oxidase  
 activity assay was used to confirm the increased activity/expression of this family of proteins upon exposure to hypoxia (or dual  
 hypoxia/IFN- $\gamma$ ). C) ANGPTL4 ELISA was used to confirm the upregulation of this protein under hypoxia or dual hypoxia/IFN- $\gamma$   
 priming. D) CFH Western Blot was a second means of confirming the upregulation by IFN- $\gamma$  and dual priming seen from the mass spec  
 data. \*  $p < 0.05$ , \*\*\*  $p < 0.0001$

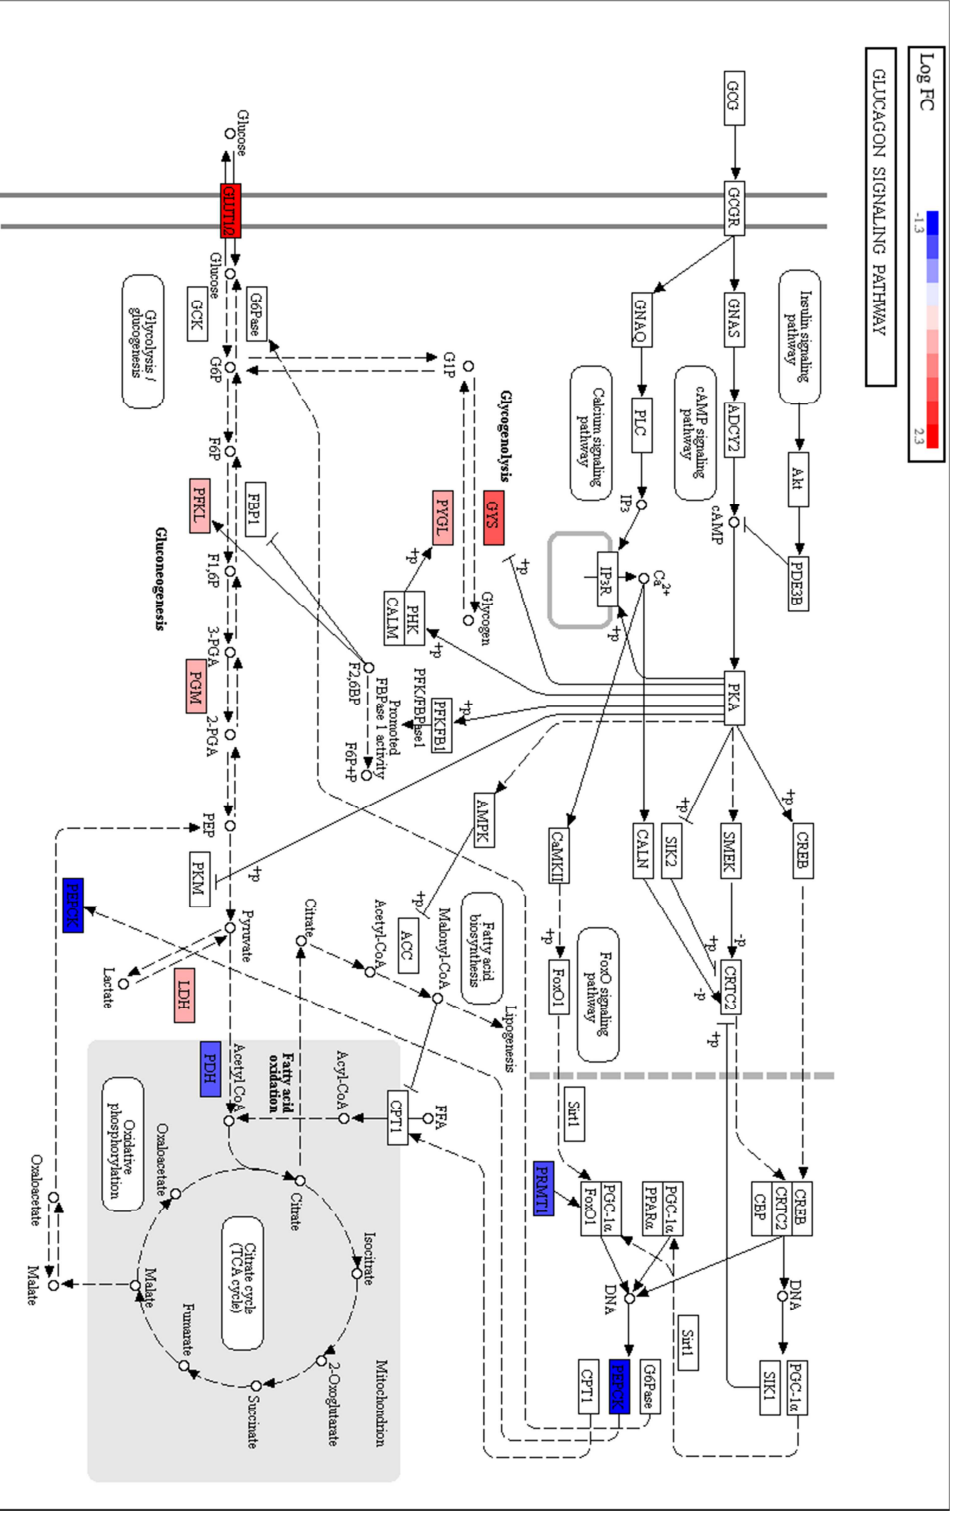

**Supplemental Figure 3** The effect of dual printing on the expression of proteins in the glucagon signaling pathway. The heat map at the top left shows the log2 fold change difference in expression of proteins, where blue indicates a down-regulated protein and red indicates an upregulated protein. Only those proteins that met our criteria for differential expression are shown (log2FC > 0.6 and p < 0.05)

761  
762  
763  
764  
765  
766  
767  
768  
769  
770  
771  
772  
773  
774  
775  
776  
777  
778  
779  
780  
781  
782  
783  
784  
785  
786  
787





|                                               | <b>IFN-γ</b> | <b>Hypoxia</b> | <b>Dual</b> |
|-----------------------------------------------|--------------|----------------|-------------|
| % of proteins that are DE                     | 12.10%       | 8.80%          | 20.50%      |
| % of DE proteins that are in the mitochondria | 12.20%       | 62.60%         | 29.30%      |

|                       | <b>IFN-γ</b> | <b>Hypoxia</b> | <b>Dual</b>  |
|-----------------------|--------------|----------------|--------------|
| Beta- alanine         | <b>6.56</b>  | <b>1.63</b>    | <b>10.60</b> |
| hypotaurine           | <b>2.27</b>  | 1.51           | <b>3.45</b>  |
| L-kynurenine          | <b>1E+99</b> | 0.00           | <b>1E+99</b> |
| L-tyrosine            | <b>1E+99</b> | 0.00           | <b>1E+99</b> |
| D-glucose             | 1.20         | 1.45           | <b>2.88</b>  |
| O-Phosphoethanolamine | 1.15         | <b>2.92</b>    | <b>2.45</b>  |
| pyruvic acid          | 0.72         | 0.44           | 0.49         |
| L-(+) lactic acid     | <b>0.55</b>  | 1.54           | <b>1.83</b>  |
| taurine               | <b>1E+99</b> | <b>1E+99</b>   | <b>1E+99</b> |

|        | <b>IFN-γ</b> | <b>Hypoxia</b> | <b>Dual</b>  | <b>Function</b>                                          |
|--------|--------------|----------------|--------------|----------------------------------------------------------|
| C1QBP  | -0.12        | <b>-1.2</b>    | <b>-1.13</b> | inhibits complement factor 1                             |
| C1R    | <b>2.55</b>  | -0.51          | <b>2.66</b>  | forms complement factor 1                                |
| C1S    | <b>2.01</b>  | -0.07          | <b>1.94</b>  | forms complement factor 1                                |
| CD47   | <b>1.24</b>  | 0.01           | <b>1.19</b>  | protection from phagocytosis; transendothelial migration |
| CD97   | <b>1.39</b>  | 0.17           | <b>1.23</b>  | chemotaxis                                               |
| CFH    | <b>6.8</b>   | 0.49           | <b>7.38</b>  | helps direct complement to pathogens vs. host cells      |
| CSF1   | <b>3.41</b>  | -0.28          | <b>3.18</b>  | monocyte maturation                                      |
| CXCL9  | <b>6.51</b>  | 0.03           | <b>6.8</b>   | chemotaxis; antimicrobial                                |
| CXCL10 | <b>2.04</b>  | 0.12           | <b>1.96</b>  | chemotaxis; antimicrobial                                |
| CXCL11 | <b>2.44</b>  | -0.13          | <b>2.38</b>  | chemotaxis; antimicrobial                                |

|          |             |              |             |                                                       |
|----------|-------------|--------------|-------------|-------------------------------------------------------|
| HLA-E    | <b>3.01</b> | -0.03        | <b>3.47</b> | protects cells from NK cells                          |
| HLA-F    | <b>7.16</b> | 0.16         | <b>6.97</b> | possibly immune tolerance                             |
| IDO1     | <b>6.64</b> | 0.19         | <b>6.51</b> | immune tolerance                                      |
| LGALS3BP | <b>1.54</b> | -0.22        | <b>1.32</b> | galectin 3 binding protein                            |
| LGALS9B  | <b>4.76</b> | <b>-0.88</b> | <b>4.11</b> | analog of galectin 9                                  |
| LRRC32   | 0.3         | 0.35         | <b>0.89</b> | promotes surface expression of TGF- $\beta$ on T-regs |
| SERPING1 | <b>3.61</b> | 0.81         | <b>3.7</b>  | inhibits complement factor 1                          |
| PDL1     | <b>6.38</b> | -0.2         | <b>6.27</b> | immune tolerance                                      |
| WARS     | <b>3.88</b> | -0.08        | <b>3.78</b> | tryptophan production                                 |

|         | <b>IFN-<math>\gamma</math></b> | <b>Hypoxia</b> | <b>Dual</b>  |
|---------|--------------------------------|----------------|--------------|
| AGRN*   | <b>4.35</b>                    | <b>1.47</b>    | <b>6.16</b>  |
| COL1A1  | <b>-1.37</b>                   | -0.57          | <b>-2.22</b> |
| COL1A2  | <b>-1.03</b>                   | -0.48          | <b>-1.61</b> |
| COL2A1  | <b>-1.42</b>                   | <b>-0.64</b>   | <b>-2.67</b> |
| COL3A1  | <b>-1.05</b>                   | 0.13           | <b>-1.16</b> |
| COL4A1  | <b>0.65</b>                    | 0.46           | <b>1.21</b>  |
| COL4A2  | 0.51                           | 0.54           | <b>4.18</b>  |
| COL5A1  | <b>-0.75</b>                   | -0.14          | <b>-0.92</b> |
| COL5A2  | <b>-0.9</b>                    | <b>-0.74</b>   | <b>-2.27</b> |
| COL6A2  | 0.18                           | <b>0.61</b>    | <b>0.89</b>  |
| COL6A3  | 0.1                            | <b>0.63</b>    | <b>0.76</b>  |
| COL12A1 | <b>-0.97</b>                   | <b>-0.96</b>   | <b>-2.59</b> |
| COL15A1 | <b>-1.06</b>                   | -0.56          | <b>-1.77</b> |
| COL16A1 | <b>-0.71</b>                   | -0.2           | <b>-0.67</b> |
| CTGF    | <b>-2.25</b>                   | 0.46           | <b>-1.94</b> |
| ELN     | <b>-1.27</b>                   | -0.26          | <b>-1.36</b> |
| FBLN1   | <b>-0.73</b>                   | -0.45          | -0.17        |
| FBN1    | -0.02                          | 0.26           | <b>0.91</b>  |
| LAMA2*  | <b>0.67</b>                    | -0.15          | <b>1.34</b>  |
| LAMA4   | <b>1.67</b>                    | 0.27           | <b>1.83</b>  |

|        |              |             |              |
|--------|--------------|-------------|--------------|
| LAMB1  | <b>-1.03</b> | -0.37       | <b>-1.11</b> |
| LAMC1  | <b>-0.67</b> | 0.05        | -0.38        |
| LOX    | -0.43        | <b>1.05</b> | <b>0.96</b>  |
| LOXL1* | 0.22         | <b>0.72</b> | <b>2.11</b>  |
| LOXL2  | <b>-0.79</b> | <b>0.99</b> | 0.27         |
| LOXL3* | <b>0.65</b>  | <b>2.72</b> | <b>4.21</b>  |
| PLOD1  | 0.08         | <b>0.68</b> | 0.49         |
| PLOD2  | 0.27         | <b>1.74</b> | <b>1.9</b>   |
| SPARC  | <b>-1.56</b> | 0.21        | <b>-1.13</b> |
| THBS1  | <b>-1.25</b> | 0.13        | <b>-0.76</b> |
| THBS2  | <b>-1.62</b> | 0.16        | <b>-1.04</b> |
| TIMP1  | 0.38         | <b>0.91</b> | <b>0.89</b>  |
| TIMP3  | -0.56        | 0.37        | <b>-0.86</b> |
| TNC    | 0.03         | 0.01        | <b>0.62</b>  |
